# Supplementary material for: Genetic Differentiation in Hatchery and Stocked Populations of Sea Trout in the Southern Baltic: Selection Evidence at SNP Loci
Source: MDPI journal article supplement (doi:10.3390/genes11020184), 2020-02-10
Supplement: s1 [file s1]

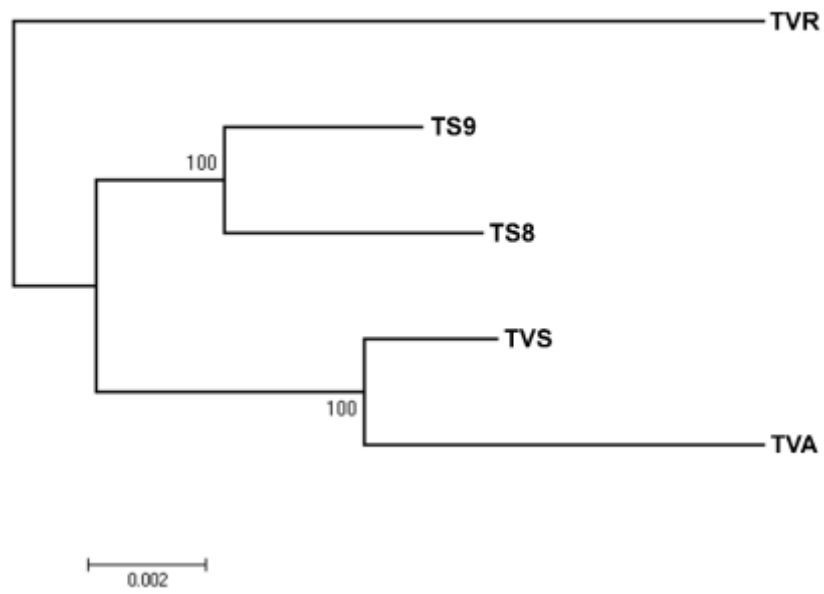

**Figure S2.** A neighbor-joining tree constructed using Nei's distances among the five sea trout populations. Bootstrap probabilities are shown on the tree.
