# Supplementary material for: Genetic Differentiation in Hatchery and Stocked Populations of Sea Trout in the Southern Baltic: Selection Evidence at SNP Loci
Source: MDPI journal article supplement (doi:10.3390/genes11020184), 2020-02-10
Supplement: s1 [file s1]

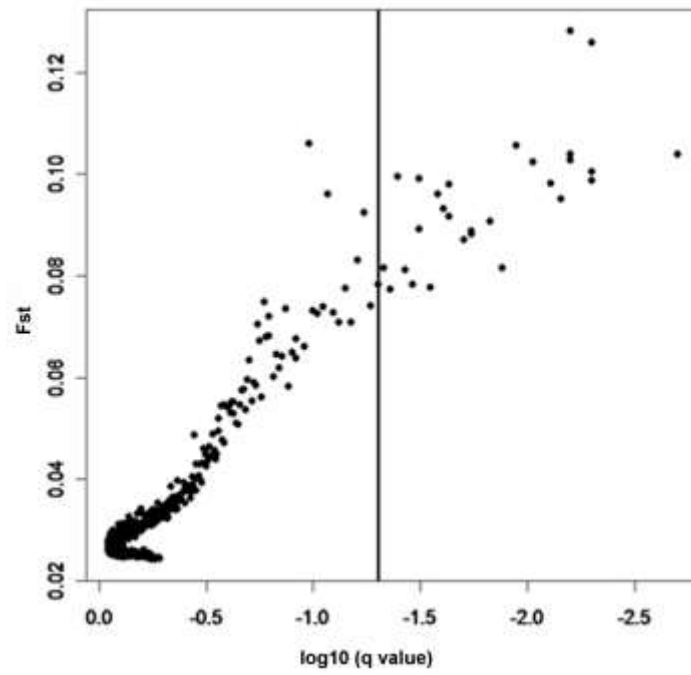

**Figure S3.**  $F_{ST}$  outlier analysis of 3843 SNPs in BAYESCAN 2.1. Pairwise  $F_{ST}$  values are plotted against the  $\log_{10}$  transformed q-values (the minimum false discovery rate at which a locus becomes significant).
